# Supplementary material
Source: Atypon-hosted journal article supplement (https://435.library.nashville.org/Record/CARL0000910109/DownloadSupplementalFile?fileId=66)
Supplement: DownloadSupplementalFile [file DownloadSupplementalFile]

## Cynthia Maddux Papers, 1901-2021 (bulk 1958-2021)

### Collection Summary

**Creator:** Maddux, Cynthia, 1953-

**Title:** Cynthia Maddux Papers

**Inclusive Dates:** 1901-2021 (bulk 1958-2021)

**Summary/Abstract:** Papers of Cynthia Maddux, documenting her personal life; her dance education in Nashville with instructor Albertine Maxwell; her international career as a professional dancer in the 1970s and its sudden end; and her struggles with mental illness in the years that followed.

**Physical Description/Extent:** 2.9 cu. ft.

**Series:** Three series:

I. Personal

II. Dance

III. Mental Illness

**Linking Entry Complexity Note:** none

**Accession Number:** Acc. 2014.014 (Series I and II); Acc. 2015.004 (Series III)

**Language:** English, with small portions in Spanish

**Stack Location:** West workroom Range 2 Section 3

**Repository:** Special Collections Division, Nashville Public Library, 615 Church Street, Nashville, TN 37219

### Chronology – Biography

*(separate chronology for dance career follows below)*

|                |                                                                                                                                      |
|----------------|--------------------------------------------------------------------------------------------------------------------------------------|
| 1953, Aug. 15  | Born in Knoxville, Tenn. to Lewis W. & Sarah S. Maddux                                                                               |
| 1957           | Family moves to Nashville, Tenn.                                                                                                     |
| 1958-1971      | Attends Burton Elementary School (eight years) and Hillsboro High School (four years)                                                |
| 1964           | Begins dancing                                                                                                                       |
| 1968, spring   | Joins Delta Beta Sigma high school sorority                                                                                          |
| 1971, June 1   | Graduates from Hillsboro High School                                                                                                 |
| 1975, Sept. 13 | Married in Nashville, Tenn.                                                                                                          |
| 1979, Jan.     | Pain due to scoliosis caused doctor to insist on immediate termination of dance career                                               |
| 1979           | Divorced                                                                                                                             |
| 1979-1981      | Works as secretary at J. C. Bradford & Co.                                                                                           |
| 1980           | Promoted to Vice President while seeking psychiatric help for depression                                                             |
| 1980, Dec.     | First psychiatric hospitalization for Electro-Convulsive Therapy (ECT) treatments, successful at lifting depression                  |
| 1980-2022      | Sought help from psychiatrists and learned about her illness while going in and out of psychiatric hospitals in sporadic intervals   |
| 1981           | Job training with Clayton Brown & Associates in Chicago, Illinois. Works in securities for one year to open Sarasota, Florida office |

|                       |                                                                                                                                                                                                                                                                                                                           |
|-----------------------|---------------------------------------------------------------------------------------------------------------------------------------------------------------------------------------------------------------------------------------------------------------------------------------------------------------------------|
| 1982                  | Purchases a car and house while working and studying to become a Certified Financial Planner (CFP).                                                                                                                                                                                                                       |
| 1985                  | Depression becomes debilitating. Second set of ECT treatments did not work.                                                                                                                                                                                                                                               |
| 1988                  | Seeks psychiatric help in Chicago, Ill. from Dr. Jan Fawcett at St. Luke's Presbyterian Hospital; outpatient for three months.                                                                                                                                                                                            |
| 1991                  | Due to mental illness, moves from Sarasota, Fla. to Nashville, Tenn. to obtain help and support from parents. Forced to sell Sarasota home to obtain income for treatment.                                                                                                                                                |
| 1992                  | No longer able to work full time.                                                                                                                                                                                                                                                                                         |
| 1993                  | Major manic episode, hospitalized over one month. Diagnosis changed from depression to bipolar disorder                                                                                                                                                                                                                   |
| 1994                  | Rejoins family's church, First Presbyterian in Nashville                                                                                                                                                                                                                                                                  |
| 1996, June 9          | Death of father                                                                                                                                                                                                                                                                                                           |
| 1997, Aug.            | Moves into condo with mother                                                                                                                                                                                                                                                                                              |
| 2004                  | Diagnosed with breast cancer in right breast. Uncertain about how cancer treatments would interact with her mental health medications, Cynthia chooses to have a total mastectomy to avoid possible mental health complications.                                                                                          |
| 2005, Feb.            | On her own, Cynthia moves into Section 8 Housing (HUD) apartment                                                                                                                                                                                                                                                          |
| 2007-2010             | Becomes volunteer and presenter of <i>In Our Own Voice</i> program with National Alliance on Mental Illness, Tennessee (NAMI-TN)                                                                                                                                                                                          |
| 2008-2018             | Becomes designee for Rev. Dr. Sandra Randleman to practice spiritual direction. After Randleman obtains her certification as a Spiritual Director, the two continue to meet monthly over the course of ten years.                                                                                                         |
| 2009, June 10         | Death of mother.                                                                                                                                                                                                                                                                                                          |
| 2010                  | Recognizing a need for it, a friend in the mental health industry offers to become Cynthia's legal power of attorney for health. She accepted, giving him the power to admit her into a hospital when she was too sick to make the decision herself.                                                                      |
| 2010                  | Cynthia trains to work in a full time position with VISTA (Volunteers in Service to America). She had not held a full time position since 1992; she was unable to work full time in this position as well.                                                                                                                |
| 2012, June 14-25      | Psychiatric hospitalization.                                                                                                                                                                                                                                                                                              |
| 2013                  | Psychiatric hospitalization after she was given steroids, against her protest, prior to having eye surgery. Reaction to steroids caused severe psychotic break including paranoia, hallucinations, and starvation, which could have led to her death had she not been hospitalized. She received treatment for two weeks. |
| 2013, Dec.–2014, Jan. | Admitted to Vanderbilt Psychiatric Hospital. Fourteen of her church friends die in a single month.                                                                                                                                                                                                                        |
| 2014                  | Cynthia makes arrangements to donate her brain to the Harvard Brain Tissue Research Center                                                                                                                                                                                                                                |
| 2018-2021             | Cynthia writes her autobiography, with emphasis on her traumas and mental illness                                                                                                                                                                                                                                         |

|              |                                                                                                                                                                                  |
|--------------|----------------------------------------------------------------------------------------------------------------------------------------------------------------------------------|
| 2019, May 31 | Admitted to Vanderbilt Psychiatric Hospital. Assigned a home health psychiatric nurse after discharge.                                                                           |
| 2019, Aug.   | Breast cancer detected in left breast. Cynthia chooses to have a total mastectomy again, as she had in 2004, to avoid possible complications with her mental health medications. |
| 2019, Nov.   | Joins Westminster Presbyterian Church                                                                                                                                            |

## **Chronology – Dance**

*(separate chronology for biography appears above)*

|                  |                                                                                                                                                                                                                                                                                                                     |
|------------------|---------------------------------------------------------------------------------------------------------------------------------------------------------------------------------------------------------------------------------------------------------------------------------------------------------------------|
| 1964, Feb.       | First time on stage, age 10, Nashville Children's Theatre                                                                                                                                                                                                                                                           |
| 1965-1970        | Attends Albertine Maxwell's Summer Dance Workshop in Bar Harbor, Maine for five consecutive summers with various teachers: Madame Hilda Butsova; George Zoritch and Howard Sayette for ballet; Nala Najan and Albertine Maxwell in East Indian or Hindu dance; Luis Montero and Albertine Maxwell in Spanish dance. |
| 1966-1971        | As a teenager Cynthia performs regularly as a member of the Nashville Ballet Society. Those she performed with included: Karoly Barta, Jim Piersall, and John Landovsky in ballet and Luis Montero and José Molina in Spanish dance.                                                                                |
| 1968, Apr. 26-29 | With the Nashville Ballet Society, Cynthia performs an East Indian dance in the Southeastern Regional Ballet Festival, Tampa, Florida.                                                                                                                                                                              |
| 1970, Apr. 24-25 | As part of the Nashville Ballet Society, Cynthia performs with José Molina in the Southeastern Regional Ballet Association Dance Festival                                                                                                                                                                           |
| 1971             | Travels to New York City to study dance for the summer. Was offered and accepts a scholarship to the School of Joffrey Ballet and remains in New York.                                                                                                                                                              |
| 1972             | Nala Najan refers Cynthia to La Meri to study ethnic dance. Cynthia receives a scholarship and becomes a secretary for La Meri                                                                                                                                                                                      |
| 1973, summer     | Assists at Festival of Ethnic Dance and performs with La Meri's Ethnic Dance Arts company (E.D.A) where Madame Sahomi Tachibana and Alan Chow both choreograph dances for Cynthia. Luis Olivares and Luis Rivera see Cynthia dance and will later invite her to perform with their companies.                       |
| 1974             | La Meri asks Cynthia to assist with her memoirs by serving as typist                                                                                                                                                                                                                                                |
| 1974, June 3     | Cynthia performs with Sahomii Tachibana and Students Japanese Dance Festival in New York Buddhist Church                                                                                                                                                                                                            |
| 1974, summer     | Cynthia performs with La Meri's Ethnic Dance Arts Company at A Summer Festival of Ethnic Dance 5 <sup>th</sup> season, where she meets Bhaskar, who was attending as a guest Hindu teacher for La Meri                                                                                                              |
| 1974, Aug.-Sept. | La Meri "loans" Cynthia to dance with Luis Rivera; she performs as part of his Spanish Dance Company, using the stage name Manuela Reyes                                                                                                                                                                            |
| 1975             | Bhaskar, with La Meri's blessing, invites Cynthia to be his dance partner in New York City. In the summer, they begin touring.                                                                                                                                                                                      |

|               |                                                                                                                                                                                                                                                           |
|---------------|-----------------------------------------------------------------------------------------------------------------------------------------------------------------------------------------------------------------------------------------------------------|
| 1975 Aug.     | Bhaskar and Cynthia choreograph new dances for Dances of India at Albertine's Summer Dance Workshop, in Bar Harbor, Maine                                                                                                                                 |
| 1976, July 23 | Cynthia and Bhaskar perform at seventh season of La Meri's Festival of Ethnic Dance Arts at Barnstable, Mass                                                                                                                                              |
| 1976, Nov.    | Cynthia leaves Bhaskar's Dances of India                                                                                                                                                                                                                  |
| 1977 spring   | Cynthia, using the stage name of Manuela Reyes, performs as part of a three month tour with José Molina Bailes Espanoles, finishing their tour at Carnegie Hall, New York City                                                                            |
| 1977, June    | Cynthia, still using the stage name of Manuela Reyes, joins Los Solera Spanish Ballet in Callela, Spain, for seven months.                                                                                                                                |
| 1977 fall     | As Isabel Arenas, Cynthia performs with José Molina for a three-month tour in the United States, including a performance in Nashville, Tenn. where Cynthia receives billing under her own name and is identified as an American and a native Nashvillian. |
| 1977-1978     | Using the stage name of Isabel Arenas, Cynthia performs for eight months with Los Solera in Lloret del Mar, Spain                                                                                                                                         |
| 1979, Jan.    | Pain due to scoliosis causes doctor to insist on immediate termination of Cynthia's dance career                                                                                                                                                          |

### **Biographical/Historical Sketch**

Cynthia Elizabeth Maddux, daughter of Lewis Wilson and Sarah Sands Maddux was born in Knoxville, Tenn. in 1953, three years after her brother. At age five, she moved with the family to Nashville, Tenn. She graduated from Hillsboro High School in 1971, where she was a member of Delta Beta Sigma sorority.

At age 11, Cynthia began studying ballet under Albertine Maxwell in Nashville. Cynthia spent five summers at Albertine's Summer Dance Workshop in Bar Harbor, Maine where she studied ballet, Spanish and East Indian (Hindu) dancing. Cynthia also studied and performed with Luis Montero, guest artist for the Nashville Ballet Society, and she performed with José Molina at the Southeast Regional Ballet Festival in 1970. In 1971, two weeks after high school graduation at the age of 17, she moved to New York City to study dance. She received a scholarship from Joffrey Ballet School for a year and a summer.

One of her former East Indian dance teachers, Nala Najan, recommended that she remain in ethnic dance and referred her to La Meri, who was considered one of the best ethnic dance teachers in the world. In 1973, Cynthia moved to Cape Cod, Mass. to study, dance, teach and become a secretarial assistant for La Meri. Cynthia danced semi-professionally with La Meri's Ethnic Dance Arts company. La Meri's introductions presented numerous other opportunities for her.

Performing at the professional level, she was Bhaskar Roy Chowdhury's partner in Dances of India. She also danced Spanish concerts with Luis Rivera, José Molina in the United States and Los Solera in Spain, using the stage names of Manuela Reyes and Isabel Arenas. In addition, Cynthia performed a Japanese dance choreographed by Madame Sahomi Tachibana at the New York Buddhist Church. In 1976 she joined José Molina Bailes Espanoles for two tours in the United States with rehearsals in Madrid, Spain for the second tour. She also danced two seasons in Spain with Los Solera for a total of 18 months in that country. Returning to Nashville, Tenn. at the age of 25, physical restrictions halted her career in 1979 when a doctor ordered her to quit dancing immediately. She lived with her parents and began working for a local securities firm.

Depression made her think she had not coped well with having to quit dancing, so she sought psychiatric help as an out-patient with Dr. Embry McKee, an associate and graduate of Vanderbilt University Medical School. There was not a diagnostic book of any kind in 1980 and medications she had been given were not working, so taking a two-week vacation, she entered the Vanderbilt Psychiatric Hospital for electroshock therapy (ECT) which worked for five years. Afterwards, she was able to relocate to Sarasota, Florida, buy a house and car and work professionally until 1987 when her depression returned. Then, she consulted some of the best

doctors in the country; one of these was Dr. Jan Fawcett, formerly the head of the National Institute of Mental Health, who was in Chicago at St. Luke's Presbyterian Hospital in 1988. He treated her for three months, but the medication he prescribed did not work. She returned to her Florida home until there was no choice but to move back to Nashville, Tenn. in 1990. Finally, in 1992, through a lengthy process, she received Social Security Disability Insurance (SSDI) which is a form of Medicare Disability Insurance. In 1993, her psychiatrist, Dr. William M. Petrie, discovered after she had suffered ten years of depression, that the more accurate diagnosis for her condition was bipolar disorder after a sudden manic attack occurred. Since 1979, she continues to live with this chronic condition that affects every aspect of her life.

Cynthia rejoined First Presbyterian Church, her family church, in 1994, but was uncomfortable there, feeling stigmatized for her illness. However, Associate Pastor Rev. Dr. Sandra Randleman took a special interest in Cynthia, and they developed a strong and caring pastoral relationship. In 2008, Cynthia became a designee (volunteer subject) for Rev. Dr. Randleman as Randleman worked to obtain her certificate as a Spiritual Director. They continued to meet for monthly counseling over the course of ten years. In 2015, Cynthia received training and became involved with Stephen Ministry under the guidance of Randleman and in 2016, Cynthia embarked upon a detailed Bible study taught by an elder of her church, Marbut Gaston.

Cynthia decided to leave First Presbyterian and joined Nashville Westminster Presbyterian Church near Thanksgiving of 2019, where she felt more welcome and comfortable. The care and concern of her new church community was particularly meaningful because she joined just a few months before the COVID-19 pandemic. In her own words, their support and outreach to her during the pandemic helped her find a closer relationship with God.

## **Scope and Contents of the Collection**

Personal papers of Cynthia Maddux, documenting her family, growing up in Nashville and attending Hillsboro High School; her dance education in Nashville with instructor Albertine Maxwell; her international career as a professional dancer in the 1970s and its sudden end; and her struggles with mental illness in the years that followed. Among the dancers documented in this collection are: José Molina; Luis Montero; Nala Najan; La Meri; Luis Rivera; Madame Sahomi Tachibana; Bhaskar; Boby Lorca; and others. Also included is an autobiography, written in 2018 through 2021, which focuses upon Cynthia's recollections of her childhood, family dynamics, friendships, spiritual beliefs, and her medical and mental health. A portion of the autobiography also recounts her experiences and feelings during the COVID-19 pandemic, which began in March 2020.

The collection is organized in to three series: I. Personal; II. Dance; and III. Mental Illness.

Series I. Personal 1901-2016 (bulk 1953-2016) contains brief family history materials on the Maddux, Sands, and Fry families; family and personal photographs; materials documenting Maddux's childhood, schooling and work experiences; and items from activities and Bible studies at First Presbyterian Church, Nashville.

Series II. Dance 1964-2012 includes promotional publicity; reviews; clippings; photographs; programs; touring and performance itineraries; correspondence with Maddux's teachers and fellow performers; dance notebooks; biographical material about fellow dancers and dance instructors; posters and sheet music. A significant quantity of material concerns Maddux's studies with Albertine Maxwell; Maddux's dances and friendship with La Meri and Bhaskar; and

her performances with Ethnic Dance Arts, Luis Rivera, Bhaskar Dances of India, José Molina, Bailes Espanoles, Los Solera, and Bobby Lorca. Particularly noteworthy is a dance notebook once belonging to La Meri from around 1940.

Series III. Mental Illness 1985-2021 documents Maddux's experiences, successes and struggles with mental illness, including depression and bipolar disorder. Materials include educational materials; medical correspondence; a mood chart she created for events 1975-2005; documentation of medication and treatments, including hospital stays and medical insurance; correspondence and information about interactions and concerns with Maddux's brother and mother during her mother's illness and death, with Cynthia's hospitalizations during that time; coping resources and aids, as well as documentation about various personal challenges of living with mental illness; resources which provided inspiration and spiritual support, including items used while experiencing a manic state. Items relating to Maddux's participation from 2008 to 2010 in the "In Our Own Voice" program of the National Alliance of Mental Illness (NAMI) are also included, consisting of informational and training materials, as well as copies of some of her personal presentations. Other materials include personal journals from 2003 to 2017, as well as an autobiography focusing on Maddux's mental health, written from 2018 to 2021, but reflecting upon her entire life.

### **Organization/Arrangement of Materials**

**Organization:** Organized into three series. Series III. is divided into topical subseries.

I. Personal 1901-2016 (bulk 1953-2016)

II. Dance 1964-2012

III. Mental Illness 1985-2021

A. Educational

B. Medical

C. Brother and Mother

D. Coping

E. Inspiration and Spirituality



F. In Our Own Voice – NAMI  
G. Journals  
H. Autobiography

**Arrangement:**

Generally chronological within each series or subseries.

**Restrictions**

**Restrictions on Access:** In library use only. Available by appointment.

**Restrictions on Use and Reproduction:** This material may be protected by copyright law (Title 17 U.S. Code). Copyright in materials created by Cynthia Maddux deeded to Nashville Public Library at time of acquisition.

**Index Terms**

**Personal Names:**

Arenas, Isabel, pseud.  
Bhaskar, 1930-2003  
Butsova, Hilda  
La Meri, 1898-1988  
Lorca, Roberto  
Maddux family  
Maddux, Cynthia, 1953-  
Maxwell, Albertine (Ellen Albertine Chaiser), 1902-1996  
Molina, José, 1936-2018  
Montero, Luis  
Najan, Nala, 1932-2002  
Olivares, Luis  
Petrie, William, 1946-  
Piersall, Jim, ballet dancer  
Reyes, Manuela, pseud.  
Rivera, Luis, d. 1992  
Tachibana, Sahomi

**Corporate Names/Organizations:**

Albertine School of the Dance (Nashville, Tenn.)  
Albertine Summer Dance Workshop (Bar Harbor, Me.).  
Bhaskar Dances of India, Inc.  
Delta Beta Sigma (High school sorority : Nashville, Tenn.)  
Ethnic Dance Arts, Inc.  
First Presbyterian Church (Nashville, Tenn.)  
Hillsboro High School (Nashville, Tenn.)  
Joffrey Ballet School--Alumni and alumnae--Biography  
José Molina Bailes Españoles

Los Solera Spanish Ballet  
Luis Rivera Spanish Dance Company  
NAMI Tennessee  
Nashville Ballet Society  
New York Buddhist Church (New York, N.Y.)  
Vanderbilt Psychiatric Hospital

**Conference Names:**

Southeastern Regional Ballet Festival  
Summer Festival of Ethnic Dance

**Subjects:**

Ballet companies—New York (State)—New York  
Ballet companies—Tennessee—Nashville  
Ballet dancers--Biography  
Ballet dancers—Training of  
Ballet—New York (State)—New York  
Ballet—Tennessee—Nashville  
Bible--Study and teaching--Presbyterian Church  
Brothers and sisters—Family relationships  
COVID-19 Pandemic, 2020—Tennessee—Nashville—Personal narratives  
Dance--History--20th century--Sources  
Dance—India  
Dance—Spain  
Dance—Study and teaching—New England  
Dance—Study and teaching—New York (State)—New York  
Dance—Study and teaching—Tennessee—Nashville  
Dance companies—Spain  
Dance companies—United States  
Dance costume--Photographs  
Dance festivals—New England  
Dance festivals—New York (State)  
Dance festivals—Southern States  
Dance schools—New England  
Dance schools—New York (State)—New York  
Dance schools—Tennessee—Nashville  
Dance teachers—New England  
Dance teachers—Tennessee—Nashville  
Dance teachers—United States—Biography--Sources  
Dancers—Biography—Sources  
Dancers—New York (State)—New York  
Dancers--Photographs  
Dancers—Spain  
Dancers—Tennessee--Nashville  
Dancers—United States  
Depressed persons—Family relationships

Depression in women—United States  
 Depression, Mental—Personal accounts  
 East Indians—New York (State)—New York—Biography  
 Families of the mentally ill—United States  
 Girls—Societies and clubs  
 Greek letter societies—Tennessee—Nashville  
 High school girls—Tennessee—Nashville  
 High school student activities—Tennessee—Nashville  
 High school students—Social conditions  
 High schools—Tennessee—Nashville  
 Male dancers—United States  
 Manic-depressive illness—Treatment  
 Manic-depressive persons—Biography  
 Manic-depressive persons—Family relationships  
 Mental health—Personal narratives  
 Mental health—Religious aspects—Christianity  
 Mental health—United States  
 Mental health education—United States  
 Mental health services—Tennessee—Nashville  
 Mental illness—United States--Biography  
 Mother-daughter relationship  
 Nonprofit organizations—Tennessee—Nashville  
 Performing arts—New England  
 Performing arts—New York (State)—New York  
 Performing arts—Tennessee—Nashville  
 Presbyterians—Tennessee—Nashville  
 Psychiatrists—Tennessee—Nashville  
 Women—Family relationships  
 Women—Mental health  
 Women—New England—History—20<sup>th</sup> century—Sources  
 Women—Tennessee—History—20<sup>th</sup> century—Sources  
 Women—Tennessee—History—21<sup>st</sup> century—Sources  
 Women—Tennessee—Nashville  
 Women—United States—History—20<sup>th</sup> century—Sources  
 Women dancers—United States—Biography  
 Women in the arts—United States

**Places:**

Bar Harbor (Me.)--History--20th century--Sources  
 Barcelona (Spain : Province) – Description and travel  
 Barnstable (Mass.)--Social life and customs--20th century--Sources  
 Barnstable (Mass.)--History--20th century--Sources  
 Cape Cod (Mass.)—History—20<sup>th</sup> century--Sources  
 Catalonia (Spain) – Description and travel  
 Costa Brava (Spain) – Description and travel  
 Nashville (Tenn.)—History--20th century--Sources

Nashville (Tenn.)—History--21st century--Sources  
Nashville (Tenn.)--Religious life and customs--21st century--Sources  
Nashville (Tenn.)--Social life and customs--20th century--Sources  
New England--Description and travel  
New England—History--20th century--Sources  
New York (N.Y.)--History--20th century--Sources  
New York (N.Y.)--Social life and customs--20th century--Sources  
Spain--Social life and customs--20th century

**Genre/Document Types:**

Articles  
Autobiographies (literary works)  
Clippings (information artifacts)  
Correspondence  
Dance notation  
Diaries  
Excerpts  
Manuals (instructional materials)  
Manuscripts (documents)  
Medical records  
Notebooks  
Photographs  
Programs (documents)  
Resumes (personnel records)

**Occupations:**

Dance teachers  
Dancers  
Psychiatrists

**Added Author, Personal Name:**

La Meri, 1898-1988  
Mitchell, Jack, 1925-2013

**Added Author, Corporate Heading:**

Bhaskar Dances of India, Inc.  
First Presbyterian Church (Nashville, Tenn.)  
NAMI Tennessee  
National Alliance on Mental Illness

**Added Title:**

In Our Own Voice

**Associated and Related Material**

Related materials: The Albertine Society Collection is held by the Special Collections Division of the Nashville Public Library.

Other archival collections: The Jerome Robbins Dance Division of the New York Public Library holds several associated collections, including: La Meri Papers; Nala Najan Papers; and Bhaskar Roy Chowdhury Papers.

### **Separated Material**

Oversize items are housed in Box 5 of the collection; separation notices have been used throughout the collection when appropriate to direct researchers to oversized items. Box 5 does not have an itemized inventory.

*Dark Glasses and Kaleidoscopes*, a VHS videotape produced in 2003 by the Depression and Bipolar Support Alliance (DBSA) was weeded from the collection due to its obsolete format, but its content is available online. See Series III. Educational subseries for details.

A Karex Silverchrome videotape of a performance by Bhaskar, possibly recorded in 1975 at Albertine's Summer Dance Workshop, was weeded from the Cynthia Maddux Papers at the Nashville Public Library and sent to the Jerome Robbins Dance Division of the New York Public Library in Jan. 2020, with a request that if NYPL digitized the video at any point in the future, that a copy be sent to NPL for incorporation into the Cynthia Maddux Papers.

### **Administrative Information**

**Additional Physical Form Available:** none

**Location of Originals/Duplicates:** none

**Copyright:** Copyright in materials created by Cynthia Maddux deeded to Nashville Public Library at time of acquisition. The Nashville Public Library does not have intellectual property rights to any other materials. Materials created by others are protected by copyright law (Title 17 U.S. Code). All intellectual property rights of photographs taken by Jack Mitchell are retained by the Jack Mitchell Archives (as of January 2022).

**Preferred Citation:** [description of item or folder heading], [series title], Cynthia Maddux Papers, Special Collections Division, Nashville Public Library.

**Immediate Source of Acquisition:** Donated to the Special Collections Division of the Nashville Public Library by Cynthia Maddux in 2014 and 2015.

**Ownership and Custodial History:** Created or collected by Cynthia Maddux and in her possession until donated to the Nashville Public Library.

**Processing Information:** Processed by donor and volunteer Cynthia Maddux, 2017-2021, with supervision from staff member Linda Barnickel. Finding aid including chronology and biography created by donor Cynthia Maddux, 2020-2021, with review and revision by staff member Linda Barnickel.

**Accruals:** No further accruals are expected.

### **Other Finding Aids**

none

### **Electronic Location and Access**

none

**References to Works by or about Collection Creator/Topic**

none

**Detailed Description of the Collection**

**Series I. Personal, 1901-2016 (bulk 1953-2016) .6 cu. ft.**

Arrangement: Chronological

| Box                              | Folder | Description                                      | Date            |
|----------------------------------|--------|--------------------------------------------------|-----------------|
| 1                                | 1      | Ralph Guest Maddux and Lewis Wilson Maddux       | ca 1960         |
| 1                                | 2      | Family History – Sands                           | n.d.            |
| 1                                | 3      | Family History – Fry family                      | 1901, 1926      |
| 1                                | 4      | Christening dress story – Cleon Sands, Maury Co. | ca 1950         |
| 1                                | 5      | Cynthia as a Baby                                | 1953 – ca. 1955 |
| 1                                | 6      | Elementary School                                | 1958 – 1967     |
| 1                                | 7      | High School                                      | 1968 – 1991     |
| 1                                | 8      | Sorority – Delta Beta Sigma                      | 1969 – 1971     |
| 1                                | 9      | Wedding Pictures                                 | 1975            |
| 1                                | 10     | Pre-wedding and Divorce Papers                   | 1975 – 1979     |
| 1                                | 11     | Resumes and related                              | 1978 – 2012     |
| 1                                | 12     | Work in Nashville, Tenn.                         | 1980 – 1983     |
| 1                                | 13     | Work in Chicago, Ill. and Sarasota, Fla.         | 1984 – 1985     |
| 1                                | 14     | Licenses – Work                                  | 1987 – 1994     |
| 1                                | 15     | Certified Financial Planner                      | 1990 – 1995     |
| 1                                | 16     | First Presbyterian Church – Nashville, Tenn.     | 1994 +          |
| 1                                | 17     | First Presbyterian Church – Stephen Ministry     | 2015-2016       |
| <b>FIRST PRESBYTERIAN CHURCH</b> |        |                                                  |                 |
| 7                                | 1      | Sunday Bible Study notebook (Disciple) materials | 2016            |
| 7                                | 2      | Sunday Bible Study notebook - Old Testament      | 2016            |
| 7                                | 3      | Sunday Bible Study notebook – New Testament      | 2016            |
| 7                                | 4      | Cynthia's notes – Wednesday night Bible Study    | 2016            |
| 7                                | 5      | Understanding Islam – Panel Discussion           | 2016            |
| 1                                | 18     | College                                          | 1994 – 2012     |
| 1                                | 19     | Bluegrass Symposium Presentation                 | 2000            |
| 1                                | 20     | Albertine Ballet Society                         | 2005            |

**Series II Dance, 1964-2012 1.3 cu. ft.**

Arrangement: Roughly chronological

| Box | Folder | Description | Date |
|-----|--------|-------------|------|
|-----|--------|-------------|------|

|   |    |                                                                                                                    |                 |
|---|----|--------------------------------------------------------------------------------------------------------------------|-----------------|
| 2 | 1  | Children's Theatre                                                                                                 | 1964 – 1965     |
| 2 | 2  | Dance with Albertine                                                                                               | 1967            |
| 2 | 3  | Dance with Albertine                                                                                               | 1968            |
| 2 | 4  | Dance with Albertine                                                                                               | 1969            |
| 2 | 5  | Dance with Albertine                                                                                               | 1970 – 1971     |
| 2 | 6  | Dance – New York City                                                                                              | 1971            |
| 2 | 7  | Dance – Bar Harbor, Maine – documents                                                                              | 1965 – 1970     |
| 2 | 8  | Dance – Bar Harbor, Maine – photographs                                                                            | 1965 – 1970     |
| 2 | 9  | Correspondence with Mme. Hilda Butsova                                                                             | 1965 – 1994     |
| 2 | 10 | José Molina – dance program                                                                                        | 1971            |
| 2 | 11 | La Meri's dance notebook                                                                                           | ca. 1940        |
| 2 | 12 | La Meri's biographical articles                                                                                    | 1972 – 1979     |
| 2 | 13 | La Meri's Dance and Written Autobiographies                                                                        | 1973            |
| 2 | 14 | photos of La Meri                                                                                                  | ca. 1970        |
| 2 | 15 | La Meri's Dance Co. publicity (semi-professional)                                                                  | 1972 – 1975     |
| 2 | 16 | La Meri's Summer Dance Festival- Barnstable, MA –<br>4 <sup>th</sup> season documents                              | 1973            |
| 2 | 17 | La Meri's Summer Dance Festival 4 <sup>th</sup> season<br>photographs                                              | 1973            |
| 2 | 18 | Cynthia's photographs and proofs                                                                                   | 1973            |
| 2 | 19 | Barry Edson Ballet Co. – (Cape Cod)                                                                                | 1973            |
| 2 | 20 | La Meri's Ethnic Dance Arts Company - programs and<br>photographs (semi-professional)                              | 1973 – 1974     |
| 2 | 21 | La Meri's Summer Dance Festival 5 <sup>th</sup> season documents                                                   | 1974            |
| 2 | 22 | La Meri's Summer Dance Festival 5 <sup>th</sup> season photographs                                                 | 1974            |
| 2 | 23 | reviews & posters (La Meri) @ Martha's Vineyard, MA                                                                | 1974            |
| 2 | 24 | International Institute of Boston performance (semi-pro)                                                           | 1974            |
| 2 | 25 | Buddhist Church, New York, NY (Sahomi Tachibana<br>choreographer)                                                  | 1974            |
| 2 | 26 | Cynthia's dance photographs                                                                                        | 1974 – 1975     |
| 2 | 27 | La Meri's Company promotions & reviews                                                                             | 1975            |
| 3 | 1  | Cynthia's Dance Notebook (with La Meri)                                                                            | 1973 – 1975     |
| 3 | 2  | Cynthia's Dance Notebook (with La Meri)                                                                            | 1974 – 1975     |
| 3 | 3  | Cynthia's Dance Notebook (with La Meri & Bhaskar)                                                                  | 1974 – 1975     |
| 3 | 4  | <i>Separation Notice Only (see Box 5 Folder 11)</i><br><i>Publicity Photographs by Jack Mitchell, New York, NY</i> | 1976            |
| 3 | 5  | Luis Rivera programs and letters                                                                                   | 1975 – 1976     |
| 3 | 6  | Dance Notes from Bhaskar                                                                                           | 1973 – 1975     |
| 3 | 7  | Bhaskar-Dances of India- promotional materials                                                                     | 1975 – 1975     |
| 3 | 8  | Itineraries at Union Wages – Bhaskar- Dances of India                                                              | 1976 – 1977     |
| 3 | 9  | Bhaskar – Dances of India - programs                                                                               | 1975 – 1976     |
| 3 | 10 | Bhaskar – Dances of India – reviews                                                                                | 1975 –lorca1976 |
| 3 | 11 | Bhaskar – Miscellaneous                                                                                            | 1976            |
| 3 | 12 | Publicity for Tennessee performances                                                                               | 1977            |
| 3 | 13 | Programs – José Molina Bailes Espanoles                                                                            | 1976 – 1977     |
| 3 | 14 | Itinerary and tour – José Molina Bailes Espanoles                                                                  | 1976            |

|   |    |                                          |             |
|---|----|------------------------------------------|-------------|
| 3 | 15 | Reviews – José Molina Bailes Espanoles   | 1977        |
| 3 | 16 | Los Solera Spanish Ballet                | 1976 – 1977 |
| 4 | 1  | Vacation time in Spain                   | 1976 – 1977 |
| 4 | 2  | Boby Lorca – Flamenco Dancer             | 1976 – 1977 |
| 4 | 3  | Book – Bobby Lorca                       | 1988        |
| 4 | 4  | La Meri's Obituary and Tributes          | 1988        |
| 4 | 5  | Correspondence from dancers and teachers | 1973 – 2012 |

Box 5 contains oversize items. Separation notices have been used where appropriate within the individual folders of the collection, therefore there is not an itemized list of the contents of Box 5.

### **Series III. Mental Illness (1985 -2021) 1 cu. ft.**

Arrangement: Topical subseries

| Box                         | Folder | Description                                                                                                                                                                                                                                                                                                                                                                                                                           | Date        |
|-----------------------------|--------|---------------------------------------------------------------------------------------------------------------------------------------------------------------------------------------------------------------------------------------------------------------------------------------------------------------------------------------------------------------------------------------------------------------------------------------|-------------|
| <b>EDUCATIONAL</b>          |        |                                                                                                                                                                                                                                                                                                                                                                                                                                       |             |
| 6                           | 1      | Resources (1 <sup>st</sup> folder of 2)                                                                                                                                                                                                                                                                                                                                                                                               | 1994 – 2015 |
| 6                           | 2      | Resources (folder 2 of 2)                                                                                                                                                                                                                                                                                                                                                                                                             | 1995        |
| <i>Online content:</i>      |        |                                                                                                                                                                                                                                                                                                                                                                                                                                       |             |
|                             |        | Video: <i>Dark Glasses and Kaleidoscopes</i><br>produced by Depression and Bipolar Support Alliance (DBSA)<br>Original VHS videotape weeded from collection, but content<br>available online (as of Feb. 2022):<br>YouTube: <a href="https://youtu.be/-mh21rHfxNg">https://youtu.be/-mh21rHfxNg</a> ; posted by Depression<br>and Bipolar Support Alliance (DBSA) <a href="http://www.dbsalliance.org">http://www.dbsalliance.org</a> | 2003        |
| 6                           | 3      | bp (Bi-Polar) Magazine “Bipolar Goes Hollywood”                                                                                                                                                                                                                                                                                                                                                                                       | 2009        |
| <b>MEDICAL</b>              |        |                                                                                                                                                                                                                                                                                                                                                                                                                                       |             |
| 6                           | 4      | Mood chart (events 1975-2005)                                                                                                                                                                                                                                                                                                                                                                                                         | ca. 2007    |
| 6                           | 5      | Letters to and from psychiatrists                                                                                                                                                                                                                                                                                                                                                                                                     | 1989 – 2015 |
| 6                           | 6      | Hospitalizations                                                                                                                                                                                                                                                                                                                                                                                                                      | 1985-2018   |
| 6                           | 7      | Hospital stays in Vanderbilt Psychiatric Hospital                                                                                                                                                                                                                                                                                                                                                                                     | 1992 – 1998 |
| 6                           | 8      | Self- documented medical events                                                                                                                                                                                                                                                                                                                                                                                                       | 2005 – 2014 |
| 6                           | 9      | Doctor visits                                                                                                                                                                                                                                                                                                                                                                                                                         | 2014        |
| 6                           | 10     | Problem with United Health Care                                                                                                                                                                                                                                                                                                                                                                                                       | 2006 – 2010 |
| 6                           | 11     | Medications                                                                                                                                                                                                                                                                                                                                                                                                                           | 1985 - 2019 |
| 6                           | 12     | Donation of her brain (papers)                                                                                                                                                                                                                                                                                                                                                                                                        | 2010        |
| <b>BROTHER &amp; MOTHER</b> |        |                                                                                                                                                                                                                                                                                                                                                                                                                                       |             |
| 6                           | 13     | Cynthia's notes to Doctors about mother                                                                                                                                                                                                                                                                                                                                                                                               | 2004 – 2006 |
| 6                           | 14     | Correspondence with brother                                                                                                                                                                                                                                                                                                                                                                                                           | 2006        |
| 6                           | 15     | Letters to Pastors after Mom's death                                                                                                                                                                                                                                                                                                                                                                                                  | 2009        |



## COPING

|   |    |                                                   |             |
|---|----|---------------------------------------------------|-------------|
| 6 | 16 | Coping Statements                                 | 2001        |
| 6 | 17 | Coping – Mindfulness-based Stress Reduction       | 2004        |
| 6 | 18 | Coping – music list                               | 2014        |
| 6 | 19 | Personal challenges of living with mental illness | 1985 - 2014 |

## INSPIRATION & SPIRITUALITY

|   |    |                                                        |                |
|---|----|--------------------------------------------------------|----------------|
| 6 | 20 | Inspirational                                          | 2010 – 2013    |
| 6 | 21 | Spirituality                                           | 2010 – 2013    |
| 6 | 22 | Comforting Bible verses                                | ca 2014 - 2016 |
| 6 | 23 | Bible copied while in a manic state                    | 2006           |
| 6 | 24 | 2006 Bible scripture edited                            | 2015           |
| 6 | 25 | Excerpts of books in a stable state (inspiring)        | ca. 2015       |
| 6 | 26 | Excerpts of books in a manic state (inspiring)         | 2016 – 2018    |
| 6 | 27 | Materials of research and inspiration – (stable state) | 2014 – 2016    |
| 6 | 28 | Excerpts of books in a stable state (inspiring)        | 2016 - 2018    |

## IN OUR OWN VOICE & NAMI

|   |    |                                                                                                  |             |
|---|----|--------------------------------------------------------------------------------------------------|-------------|
| 6 | 29 | “In Our Own Voice” – Explanation and notes NAMI TN<br>National Alliance of Mental Illness        | 2009        |
| 6 | 30 | Cynthia’s application to be a presenter for “In Our Own Voice”                                   | 2009        |
| 6 | 31 | “In Our Own Voice” manual                                                                        | 2008        |
| 6 | 32 | “In Our Own Voice” presenter tips                                                                | 2008        |
| 6 | 33 | “In Our Own Voice” presentation notes and venues                                                 | 2008 – 2010 |
| 6 | 34 | “In Our Own Voice” presentations                                                                 | 2008        |
| 6 | 35 | “In Our Own Voice”- Stephen Minister – First<br>Presbyterian Church presentation solo – one hour | 2009        |
| 6 | 36 | “In Our Own Voice” Rotary Club presentation                                                      | 2010        |
| 6 | 37 | NAMI TN – VISTA                                                                                  | 2010        |

## JOURNALS

|   |    |                                       |             |
|---|----|---------------------------------------|-------------|
| 6 | 38 | “Venting”                             | 2003 – 2013 |
| 6 | 39 | Journal – Gratitude List to God       | 2005 - 2006 |
| 6 | 40 | Journals                              | 2006 – 2013 |
| 6 | 41 | Journals                              | 2010 – 2015 |
| 6 | 42 | Journals “1,000 Gifts”                | 2011 – 2012 |
| 6 | 43 | Journals                              | 2013 – 2015 |
| 6 | 44 | Journals                              | 2013 – 2017 |
| 6 | 45 | Personal Tributes to Deceased Friends | 2014 – 2016 |
| 6 | 46 | Journals                              | 2015 – 2016 |
| 6 | 47 | Journals – “Gratitude Book”           | 2016 – 2017 |

## AUTOBIOGRAPHY

|   |    |               |             |
|---|----|---------------|-------------|
| 6 | 48 | Autobiography | 2018 - 2021 |
|---|----|---------------|-------------|
